# Supplementary material for: Morphological and reactive optimization of g-C3N4-derived Co,N-codoped carbon nanotubes for hydrogen evolution reaction
Source: Royal Society of Chemistry journal article supplement (doi:10.1039/d0nj05870j), 2021-01-01
Supplement: d0nj05870j1.pdf [file d0nj05870j1.pdf]

# Morphological and Reactive Optimization of g-C<sub>3</sub>N<sub>4</sub> Derived Co,N-Codoped Carbon Nanotubes for Hydrogen Evolution Reaction

Zhuochen Yu<sup>a</sup>, Kaida Yao<sup>a</sup>, Siqi Zhang<sup>a</sup>, Yang Liu,<sup>a</sup> Yueqiu Sun<sup>a</sup>, Weimin Huang<sup>\*a,b</sup>,  
and Nan Hu<sup>\*c</sup>

*a. College of Chemistry, Jilin University, Changchun 130012, China.*

*E-mail: huangwm@jlu.edu.cn*

*b. Key Laboratory of Physics and Technology for Advanced Batteries of Ministry of  
Education, Jilin University, Changchun 130012, China.*

*E-mail: huangwm@jlu.edu.cn*

*c. Changchun Institute of Technology, Changchun 130012, China.*

*Email: hunan@ccit.edu.cn*

\*Corresponding Author E-mail address: huangwm@jlu.edu.cn (W. Huang).

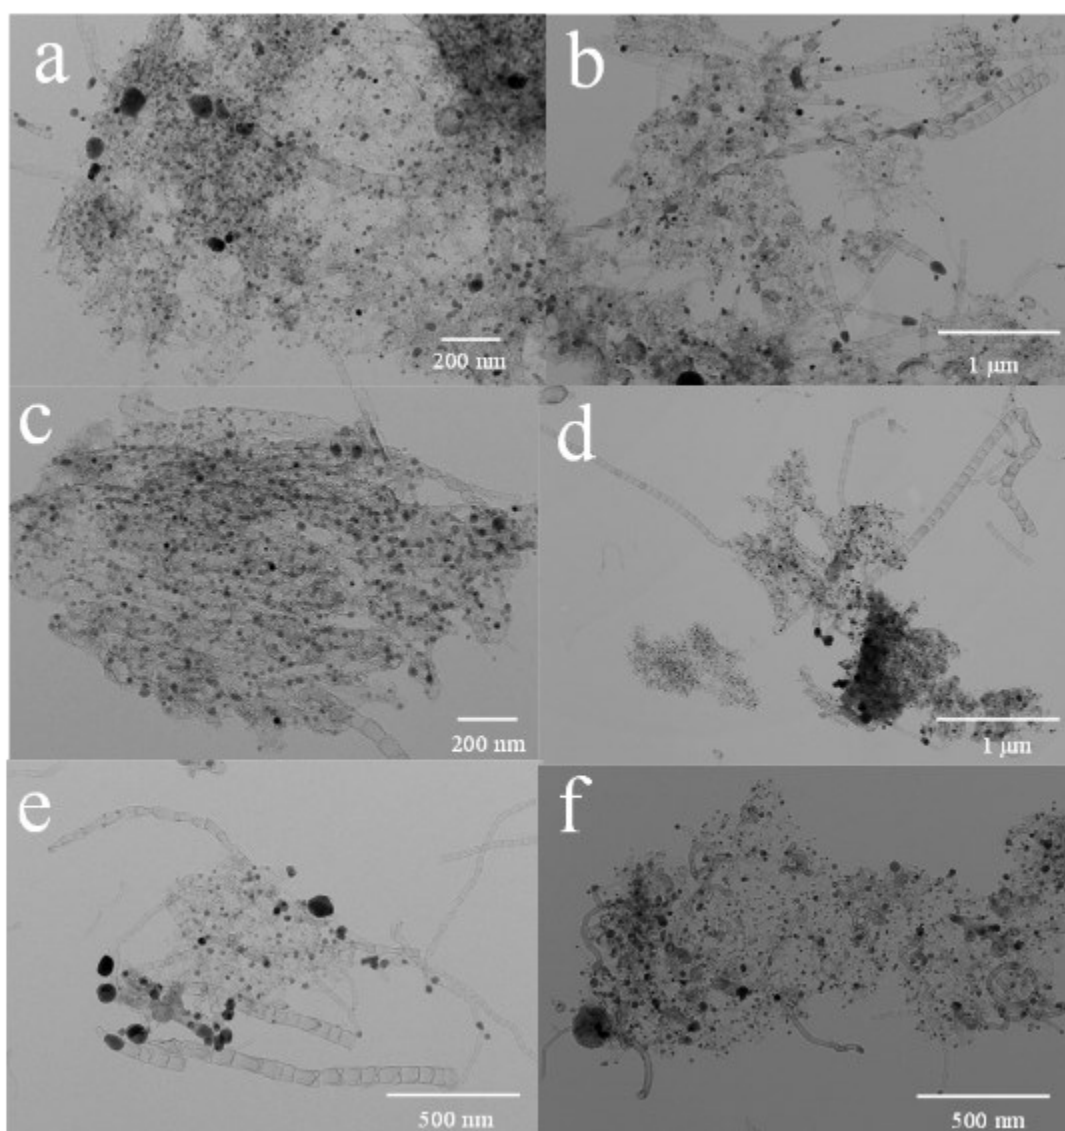

**Fig.S1** TEM images of (a) Co@BNCNT-P123<sub>0.5</sub>, (b) Co@BNCNT-P123<sub>2.5</sub>, (c) Co@BNCNT-700, (d) Co@BNCNT-900, (e) Co@BNCNT-Co<sub>0.5</sub>, and (f) Co@BNCNT-Co<sub>1.5</sub>

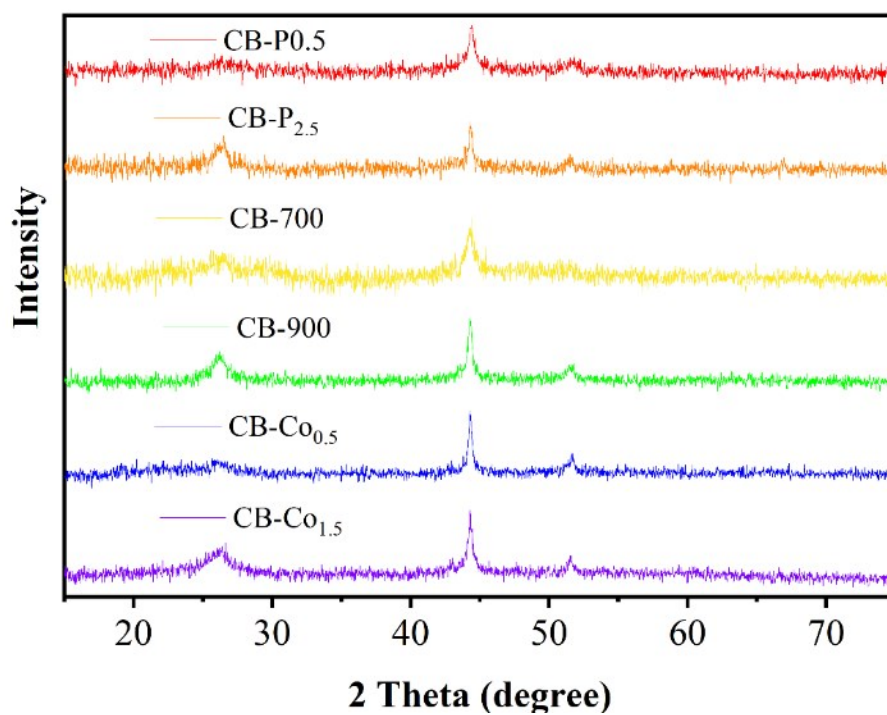

**Fig. S2** XRD comparison pattern of CB-P<sub>0.5</sub>, CB-P<sub>2.5</sub>, CB-700, CB-900, CB-Co<sub>0.5</sub> and CB-Co<sub>1.5</sub>.

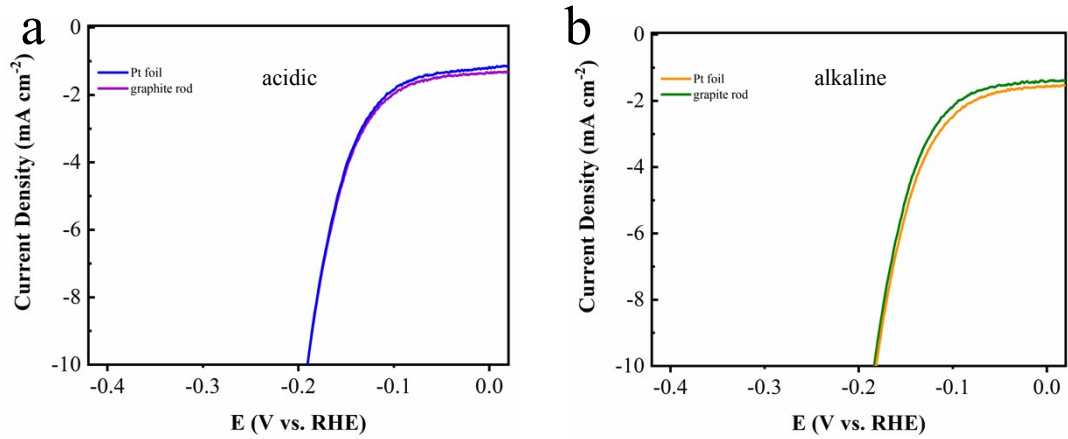

**Fig. S3** HER polarization curves of Co@BNCNT in  $N_2$ -saturated 0.5M  $H_2SO_4$  (a) and 0.1 M KOH (b) with Pt foil and graphitic rod taken as the counter electrode.
